# Supplementary material
Source: HighWire-hosted journal article supplement (https://bjsm.bmj.com/content/52/9/581)
Supplement: inline-supplementary-material-3 [file inline-supplementary-material-3.pdf]

**Figure 1. Prevalence and 95% CIs of labral tears in symptomatic and asymptomatic participants amongst studies that reported prevalence per hip**

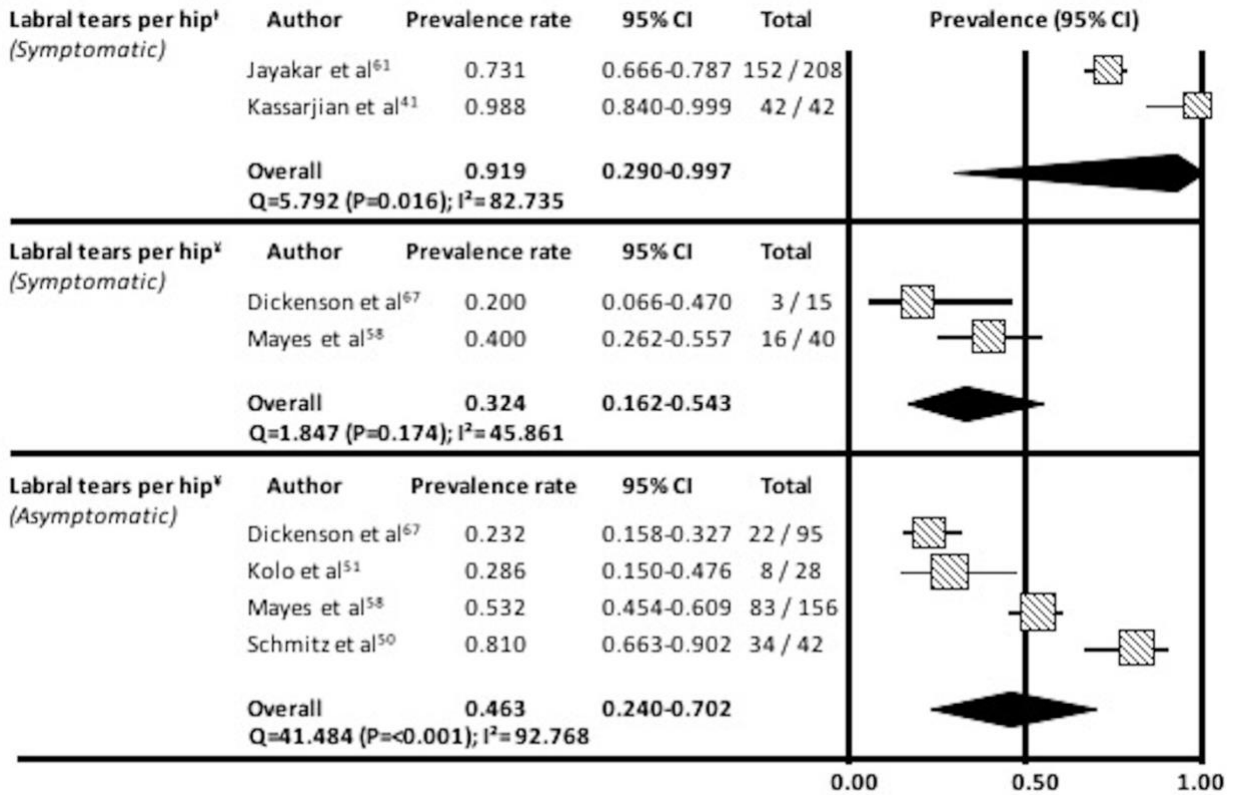

† = diagnosed with magnetic resonance arthrography; ‡ = diagnosed with magnetic resonance imaging

**Figure 2. Prevalence and 95% CIs of cartilage defects in asymptomatic participants amongst studies that reported prevalence per hip**

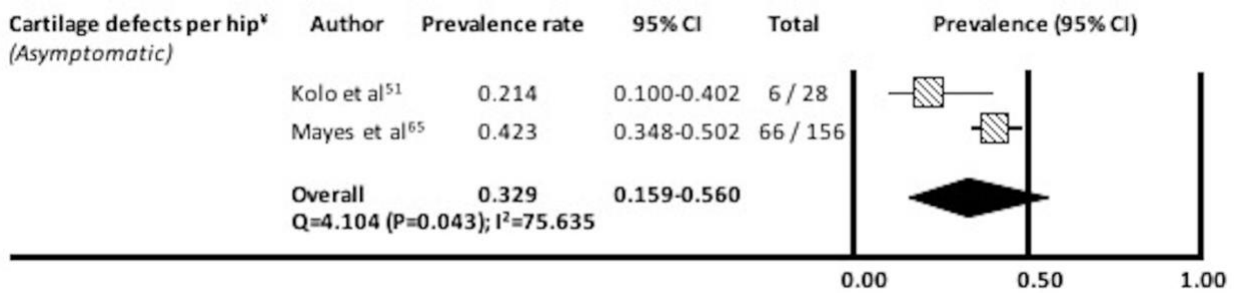

‡ = diagnosed with magnetic resonance imaging

**Table 1. Prevalence of other pathologies not reported in  $\geq 2$  symptomatic and asymptomatic studies**

| <b>Participant group</b> | <b>Per person</b>                                                                                                                                                                                                                                                                                                                                                                                                                                                                                                                                                                                                                                                                        | <b>Per hip</b>                                                                                                                                                                                                                                                                                                                                                                                                                                                                                                                                                                                               |
|--------------------------|------------------------------------------------------------------------------------------------------------------------------------------------------------------------------------------------------------------------------------------------------------------------------------------------------------------------------------------------------------------------------------------------------------------------------------------------------------------------------------------------------------------------------------------------------------------------------------------------------------------------------------------------------------------------------------------|--------------------------------------------------------------------------------------------------------------------------------------------------------------------------------------------------------------------------------------------------------------------------------------------------------------------------------------------------------------------------------------------------------------------------------------------------------------------------------------------------------------------------------------------------------------------------------------------------------------|
| <b>Symptomatic</b>       | Avascular necrosis: 0% ( <i>MR</i> ) <sup>63</sup><br>Diffuse signal increase in labrum: 6% ( <i>MR</i> ) <sup>45</sup><br>Diminutive signal increase in labrum: 2% ( <i>MR</i> ) <sup>45</sup><br>Degenerated labrum: 12% ( <i>MR</i> ) <sup>66</sup><br>Labral intrasubstance degeneration: 13% ( <i>MR</i> ) <sup>45</sup><br>Osteophytes: 32% ( <i>MR</i> ) <sup>45</sup><br>Pigmented villonodular synovitis: 0% ( <i>MR</i> ) <sup>63</sup><br>Subchondral bone cysts: 23% ( <i>MR</i> ) <sup>45</sup><br>Subchondral sclerosis: 22% ( <i>MR</i> ) <sup>45</sup><br>Synovitis: 1% ( <i>MR</i> ) <sup>63</sup><br>Transient osteoporosis of the hip: 1% ( <i>MR</i> ) <sup>63</sup> | Avascular necrosis: 0% ( <i>HR</i> ) <sup>55</sup><br>Bursitis: 0% ( <i>HR</i> ) <sup>55</sup><br>Joint effusion: 7% ( <i>MR</i> ) <sup>67</sup><br>Increased labral signal: 20% ( <i>MR</i> ) <sup>67</sup><br>Labral degeneration: 41% ( <i>MR</i> ) <sup>51</sup> ¥<br>Labral fraying: 20% ( <i>MR</i> ) <sup>61</sup><br>Labral ossification: 3% ( <i>MR</i> ) <sup>51</sup> ¥<br>Os acetabuli: 40% ( <i>MR</i> ) <sup>41</sup><br>Osteophytes: 5% ( <i>HR</i> ) <sup>55</sup><br>Subchondral bone cysts: 14.5% ( <i>HR</i> ) <sup>55</sup><br>Transverse ligament tears: 3% ( <i>HR</i> ) <sup>55</sup> |
| <b>Asymptomatic</b>      | Acetabular rim damage: 15% ( <i>HR</i> ) <sup>54</sup> †<br>Degenerated labrum: 10% ( <i>MR</i> ) <sup>66</sup><br>Hip effusion: 0% ( <i>HR</i> ) <sup>48</sup><br>Labral deformity: 10% ( <i>LR</i> ) <sup>52</sup><br>Labral ganglions: 21% ( <i>LR</i> ) <sup>52</sup><br>Labral ossification: 14% ( <i>LR</i> ) <sup>64</sup><br>Osseous bumps: 20% ( <i>MR</i> ) <sup>40</sup> ; 20% ( <i>MR</i> ) <sup>49</sup><br>Rim fracture: 11% ( <i>MR</i> ) <sup>49</sup><br>Subchondral bone cysts: 16% ( <i>MR</i> ) <sup>49</sup>                                                                                                                                                        | Acetabular rim damage: 0% ( <i>HR</i> ) <sup>54</sup> ‡<br>Joint effusion: 8% ( <i>MR</i> ) <sup>67</sup><br>Increased labral signal: 22% ( <i>MR</i> ) <sup>67</sup><br>Labral degeneration: 43% ( <i>MR</i> ) <sup>51</sup><br>Labral ossification: 14% ( <i>MR</i> ) <sup>51</sup><br>Osseous bumps: 3% ( <i>HR</i> ) <sup>57</sup>                                                                                                                                                                                                                                                                       |

† = Study group only; ¥ = Study group included symptomatic and asymptomatic hips;

‡ = Control group only

**Table 2. Additional study population characteristics for studies investigating asymptomatic participants**

| Author                         | Study population | Level of activity |                   |             | Radiographic osteoarthritis |             |            | Cam morphology | Pincer Morphology                                                                                                                          |
|--------------------------------|------------------|-------------------|-------------------|-------------|-----------------------------|-------------|------------|----------------|--------------------------------------------------------------------------------------------------------------------------------------------|
|                                |                  | Elite athlete     | Non-elite athlete | Non-athlete | Not reported                | Present (%) | Absent (%) | Not reported   | Prevalence (%)                                                                                                                             |
| Ayeni et al <sup>40</sup>      | <b>Subjects</b>  | x                 |                   |             |                             |             |            | x              | AA >50°: 55% <sup>¥</sup><br>LCEA >40°: 10% <sup>¥</sup><br>Acetabular depth ≤0.0mm: 0% <sup>¥</sup><br>Cranial AV <15°: 25% <sup>¥</sup>  |
|                                | <b>Controls</b>  |                   |                   | x           |                             |             |            | x              | AA >50°: 25% <sup>¥</sup><br>LCEA >40°: 10% <sup>¥</sup><br>Acetabular depth ≤0.0mm: 10% <sup>¥</sup><br>Cranial AV <15°: 25% <sup>¥</sup> |
| Farrell et al <sup>59</sup>    | <b>Subjects</b>  | x                 |                   |             |                             |             |            | x              | AA ≥50.5°: 55% <sup>¥</sup><br>Not reported                                                                                                |
|                                | <b>Controls</b>  |                   | x                 |             |                             |             |            | x              | Not reported<br>Not reported                                                                                                               |
| Georgiadis et al <sup>60</sup> | <b>Subjects</b>  |                   |                   |             |                             |             |            | x              | Not reported<br>Not reported                                                                                                               |
| Lahner et al <sup>42</sup>     | <b>Subjects</b>  |                   | x                 |             |                             |             |            | x              | AA >55°: 59% <sup>¥</sup><br>Not reported                                                                                                  |
|                                | <b>Controls</b>  |                   | x                 |             |                             |             |            | x              | AA >55°: 40% <sup>¥</sup><br>Not reported                                                                                                  |
| Lahner et al <sup>57</sup>     | <b>Subjects</b>  | x                 |                   |             |                             |             |            | x              | AA >55°: 34% <sup>¥</sup><br>LCEA >40°: 0% <sup>¥</sup>                                                                                    |
|                                | <b>Controls</b>  |                   |                   |             |                             | x           |            | x              | AA >55°: 2.7% <sup>¥</sup><br>LCEA >40°: 4.5% <sup>¥</sup>                                                                                 |
| Lee et al <sup>64</sup>        | <b>Subjects</b>  |                   | x                 |             |                             |             |            | x              | Not reported<br>Not reported                                                                                                               |
| Leunig et al <sup>52</sup>     | <b>Subjects</b>  |                   |                   |             |                             |             |            | x              | Gr ≥1: 22% <sup>¥</sup><br>Gr ≥2: 0% <sup>¥</sup><br>Acetabular depth ≤ 3mm: 10% <sup>¥</sup>                                              |
|                                | <b>Controls</b>  |                   |                   |             |                             | x           |            | x              | Gr ≥1: 71% <sup>¥</sup><br>Gr ≥2: 24% <sup>¥</sup><br>Acetabular depth ≤3mm: 6% <sup>¥</sup>                                               |

|                               |                 |   |   |  |                        |                                                        |                                                                                  |
|-------------------------------|-----------------|---|---|--|------------------------|--------------------------------------------------------|----------------------------------------------------------------------------------|
| Mineta et al <sup>62</sup>    | <b>Subjects</b> |   | x |  | x <sup>#</sup><br>100% | AA >55° or FHNO ratio <0.15: 45% <sup>□</sup>          | LCEA >40° or AI <0° or central AV <15° or cranial AV <0°: 37% <sup>□</sup>       |
| Panzer et al <sup>46</sup>    | <b>Subjects</b> |   | x |  | x                      | Not reported                                           | Not reported                                                                     |
| Philippon et al <sup>53</sup> | <b>Subjects</b> |   | x |  | x                      | AA ≥55°: 75% <sup>¥</sup>                              | Not reported                                                                     |
|                               | <b>Controls</b> |   | x |  | x                      | AA ≥55°: 42% <sup>¥</sup>                              | Not reported                                                                     |
| Register et al <sup>49</sup>  | <b>Subjects</b> |   | x |  | x                      | Not reported                                           | Not reported                                                                     |
| Schmitz et al <sup>50</sup>   | <b>Subjects</b> |   | x |  | x                      | Not reported                                           | Not reported                                                                     |
| Silvis et al <sup>48</sup>    | <b>Subjects</b> | x | x |  | x                      | AA >55°: 39% <sup>¥</sup>                              | Not reported                                                                     |
| Yuan et al <sup>54</sup>      | <b>Subjects</b> |   | x |  | x <sup>‡</sup><br>100% | AA >55°: 68% <sup>λ</sup><br>AA >55°: 55% <sup>¥</sup> | +ve crossover sign: 32% <sup>λ</sup><br>+ve ischial spine sign: 41% <sup>λ</sup> |
|                               | <b>Controls</b> |   | x |  | x                      | AA >55°: 8% <sup>¥</sup>                               | Not reported                                                                     |

AA, alpha angle; ¥, determined with magnetic resonance imaging; LCEA, lateral centre edge angle; mm, millimetres; AV, acetabular version; Gr, grade; †, Kellgren and Lawrence grade 0 and 1; FHNO, femoral head-neck offset; □, determined with computed tomography; AI, acetabular index; AV, acetabular version; ‡, Tonnis grade 0; λ, determined with x-ray

**Table 3. Additional study population characteristics for studies investigating symptomatic participants**

| Author                         | Study population | Symptoms                       | Level of activity |                   |             | Radiographic osteoarthritis |                         |                         | Cam morphology Prevalence | Pincer Morphology Prevalence |              |
|--------------------------------|------------------|--------------------------------|-------------------|-------------------|-------------|-----------------------------|-------------------------|-------------------------|---------------------------|------------------------------|--------------|
|                                |                  |                                | Elite athlete     | Non-elite athlete | Non-athlete | Not reported                | Present (%)             | Absent (%)              |                           |                              | Not reported |
| Domb et al <sup>55</sup>       | Subjects         | Hip pain                       | x                 |                   |             |                             |                         |                         | x                         | AA >55°: 73% <sup>¥†</sup>   | Not reported |
| Jayakar et al <sup>61</sup>    | Subjects         | Hip pain                       |                   |                   |             | x                           | x <sup>‡</sup><br>35.6% | x <sup>‡</sup><br>64.4% |                           | AA >55°: 28% <sup>†</sup>    | Not reported |
| Kassarjian et al <sup>41</sup> | Subjects         | Clinical signs of FAIS         |                   |                   |             | x                           |                         |                         | x                         | AA >55°: 93% <sup>†</sup>    | Not reported |
| Narvani et al <sup>44</sup>    | Subjects         | Groin pain                     | x                 | x                 |             |                             |                         |                         | x                         | Not reported                 | Not reported |
| Neiman et al <sup>63</sup>     | Subjects         | Hip pain                       |                   |                   |             | x                           |                         |                         | x                         | Not reported                 | Not reported |
| Neumann et al <sup>45</sup>    | Subjects         | Mechanical symptoms of the hip |                   |                   |             | x                           |                         |                         | x                         | Not reported                 | Not reported |
| Pizzolatti et al <sup>47</sup> | Subjects         | Suspicion of labral tear       |                   |                   |             | x                           |                         |                         | x                         | 33%*                         | 12%**        |

AA, alpha angle; ¥, determined with magnetic resonance imaging; †, determined with magnetic resonance arthrography; †, Tonnis grade 1-3; ‡, Tonnis grade 0; FAIS, femoroacetabular impingement syndrome; \*, no quantitative measure reported for determining cam morphology; \*\*, no quantitative measure reported for determining pincer morphology

**Table 4. Additional study population characteristics for studies investigating symptomatic and asymptomatic participants**

| Author                        | Study population | Symptoms                                              | Level of activity |                   |             | Radiographic osteoarthritis |             |            | Cam morphology<br>Prevalence (%) | Pincer Morphology<br>Prevalence (%)                                                                                                                                                                                                                                                                                    |
|-------------------------------|------------------|-------------------------------------------------------|-------------------|-------------------|-------------|-----------------------------|-------------|------------|----------------------------------|------------------------------------------------------------------------------------------------------------------------------------------------------------------------------------------------------------------------------------------------------------------------------------------------------------------------|
|                               |                  |                                                       | Elite athlete     | Non-elite athlete | Non-athlete | Not reported                | Present (%) | Absent (%) |                                  |                                                                                                                                                                                                                                                                                                                        |
| Dickenson et al <sup>67</sup> | <b>Subjects</b>  | Hip pain                                              | x                 |                   |             |                             |             | x          | Not reported <sup>§</sup>        | Not reported <sup>§</sup>                                                                                                                                                                                                                                                                                              |
|                               | <b>Controls</b>  | No hip pain                                           | x                 |                   |             |                             |             | x          | Not reported <sup>§</sup>        | Not reported <sup>§</sup>                                                                                                                                                                                                                                                                                              |
| Ji et al <sup>56</sup>        | <b>Subjects</b>  | Mechanical hip pain for 3/12 +ve clinical examination |                   |                   | x           |                             |             | x          | AA >50°: 7% <sup>‡</sup>         | LCEA >39° or central AV <10° or cranial AV <0°: 59% <sup>‡</sup>                                                                                                                                                                                                                                                       |
|                               | <b>Controls</b>  | No hip pain                                           |                   |                   | x           |                             |             | x          | AA >50°: 14% <sup>□</sup>        | LCEA >39° or central AV <10° or cranial AV <0°: 37% <sup>□</sup>                                                                                                                                                                                                                                                       |
| Kolo et al <sup>51</sup>      | <b>Subjects</b>  | Hip pain and no hip pain                              | x                 |                   |             |                             |             | x          | AA >55°: 2% <sup>¥</sup>         | Acetabular depth (+ve/normal if centre of femoral head is lateral to line connecting ant/post acetabular rim)/Acetabular version (determined by the angle between the sagittal direction and lines drawn between the ant/post acetabular rim; +ve when inclined medially/-ve when inclined laterally): 0% <sup>¥</sup> |
|                               | <b>Controls</b>  | No hip pain                                           |                   |                   |             | x                           |             | x          | AA >55°: 0% <sup>¥</sup>         | Acetabular depth (+ve/normal if centre of femoral head is lateral to line connecting ant/post acetabular rim)/Acetabular version (determined by the angle between the sagittal direction and lines drawn between the ant/post acetabular rim; +ve                                                                      |

*when inclined medially/-ve when inclined laterally): 4%<sup>‡</sup>*

|                               |                 |                                                                                           |   |   |   |                        |                   |                    |
|-------------------------------|-----------------|-------------------------------------------------------------------------------------------|---|---|---|------------------------|-------------------|--------------------|
| Mayes et al <sup>58</sup>     | <b>Subjects</b> | Hip pain in last 3 months                                                                 | x | x |   | x                      | Not reported      | Not reported       |
|                               | <b>Controls</b> | No hip pain                                                                               | x | x |   | x                      | Not reported      | Not reported       |
| Mayes et al <sup>43</sup>     | <b>Subjects</b> | Hip pain in last 3 months                                                                 | x | x |   | x                      | Not reported      | Not reported       |
|                               | <b>Controls</b> | No hip pain                                                                               | x | x |   | x                      | Not reported      | Not reported       |
| Mayes et al <sup>65</sup>     | <b>Subjects</b> | Hip pain in last 3 months                                                                 | x | x |   | x                      | Not reported      | Not reported       |
|                               | <b>Controls</b> | No hip pain                                                                               | x | x |   | x                      | Not reported      | Not reported       |
| Teichtahl et al <sup>68</sup> | <b>Subjects</b> | Hip pain with radiographic hip OA                                                         |   |   | x | x <sup>‡</sup><br>100% | Not reported      | Not reported       |
|                               | <b>Controls</b> | No hip pain                                                                               |   |   | x | x <sup>‡</sup><br>100% | Not reported      | Not reported       |
| Tresch et al <sup>66</sup>    | <b>Subjects</b> | Symptomatic individuals (groin pain >3/12, +ve FADIR test and hip int rot <20°) with FAIS |   |   | x |                        | 52% <sup>†*</sup> | 16% <sup>†**</sup> |
|                               | <b>Controls</b> | Asymptomatic individuals (-ve FADIR test and hip int rot >25°)                            |   |   | x |                        | Not reported      | Not reported       |

---

§, information regarding prevalence of morphology relative to symptoms not reported in original data paper; AA, alpha angle; ¶, determined with computed tomography arthrography; □, determined with computed tomography; ¥, determined with magnetic resonance imaging; OA, osteoarthritis; ‡, Kellgren and Lawrence grade 2 to 4; †, never had a diagnosis of hip osteoarthritis made by a medical or allied health professional; FADIR, flexion adduction internal rotation; int rot, internal rotation; FAIS, femoroacetabular impingement syndrome; †, determined with magnetic resonance arthrography; \*, no quantitative measure reported for determining cam morphology; \*\*, no quantitative measure reported for determining pincer morphology

---
